# Supplementary material for: The first transition metal phthalocyanines: sensitizing rubrene emission based on triplet–triplet annihilation
Source: Royal Society of Chemistry journal article supplement (doi:10.1039/c6pp00464d), 2017-06-13
Supplement: c6pp00464d1.pdf [file c6pp00464d1.pdf]

## Supporting Information

**The first transition metal phthalocyanines: sensitizing rubrene**

**emission based on triplet-triplet annihilation**

Jianlei Han,<sup>a,b</sup> Fei Zhang <sup>a,b</sup> , Jing You,\* <sup>a,b</sup> Yonemura Hiroaki,\* <sup>c,d</sup> Sunao Yamada,<sup>c,d</sup> Toru Morifuji,<sup>e</sup>  
Shirong Wang, <sup>a,b</sup> and Xianggao Li <sup>a,b</sup>

## S1. Absorption and Emission spectra of Oxazine 725 and IR-820

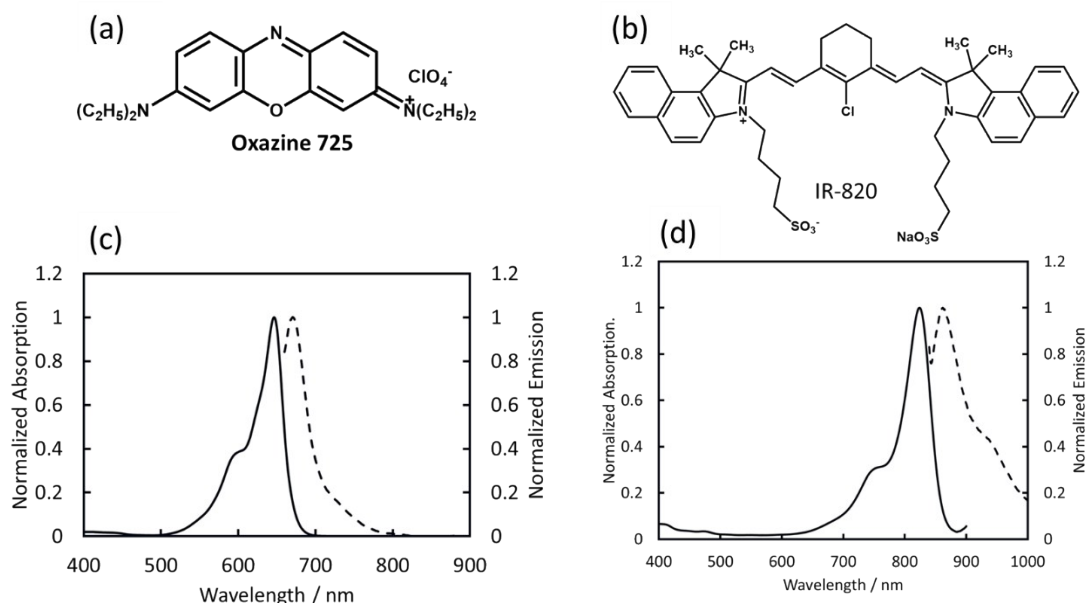

Fig.S1 Molecular structures of Oxazine 725 (a) and IR-820 (b); Normalized absorption (Left) and emission (Right) spectra for Oxazine 725 (c) and IR-820 (d).

## S2. Measurement of PUC efficiency

The upconversion quantum yield ( $\Phi_{PUC}$ ) was determined with Oxazine 725 ( $\Phi_F = 11\%$ , in MeOH with concentration of  $10^{-5}$  M)<sup>1</sup> as quantum yield standard with Eq.S1. The equation is multiplied by factor 2 in order to made the maximum quantum yield to be unit.<sup>2</sup>

$$\Phi_{PUC} = 2\Phi_S \left( \frac{A_s}{A_u} \right) \left( \frac{I_u}{I_s} \right) \left( \frac{\eta_u}{\eta_s} \right)^2 \quad \text{Eq.S1}$$

Where  $\Phi_S$ ,  $A_s$ ,  $I_s$ , and  $\eta_s$  represent quantum yield the absorbance, integrated photoluminescence, and refractive index of solvent for standard, respectively. Similarly,  $A_u$ ,  $I_u$ , and  $\eta_u$  represent those of unknown samples. In this work, the integrated region of photoluminescence for standard (Oxazine 725) was from 650 to 800 nm, for MPC-o-Cou:Rub was from 470 to 620 nm.

## S3. Decay profiles of TT absorption of MPC-o-Cou (Co, Cu, Pt, Pd)

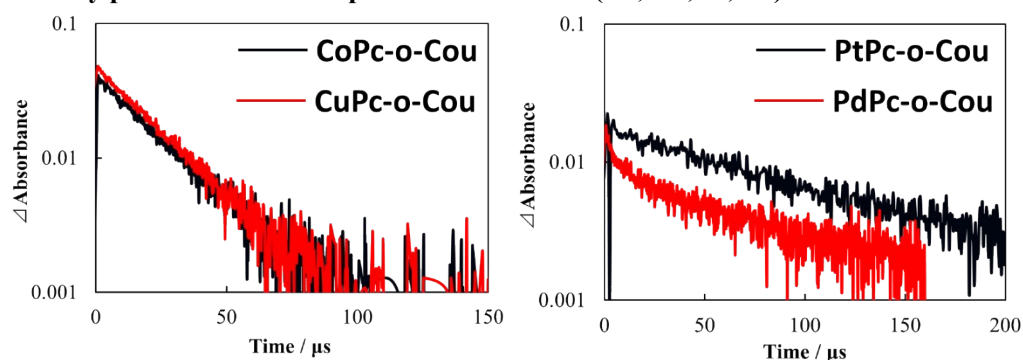

Fig.S2 Decay profiles of time-resolved transient absorption due to the triplet state of MPc-o-Cou with central metal (Cu, Co, Pt, Pd) at 298 K.

The decay profiles of  $T_0$ - $T_n$  transition of CoPc-o-Cou and CuPc-o-Cou were recorded at the maximum transition absorption in the wavelength region of 500-600 nm.<sup>3, 4</sup>

#### S4. Absorption and emission spectra of rubrene

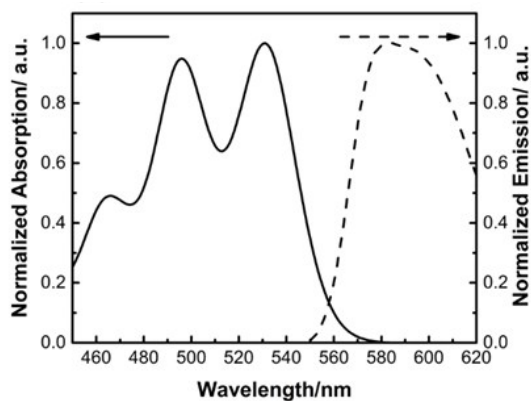

Fig.S3 Normalized absorption and fluorescence emission spectra of Rub.

#### S5. Upconversion emission spectra of MPc-o-Cou:Rub(Co, Cu, Fe, Ni)

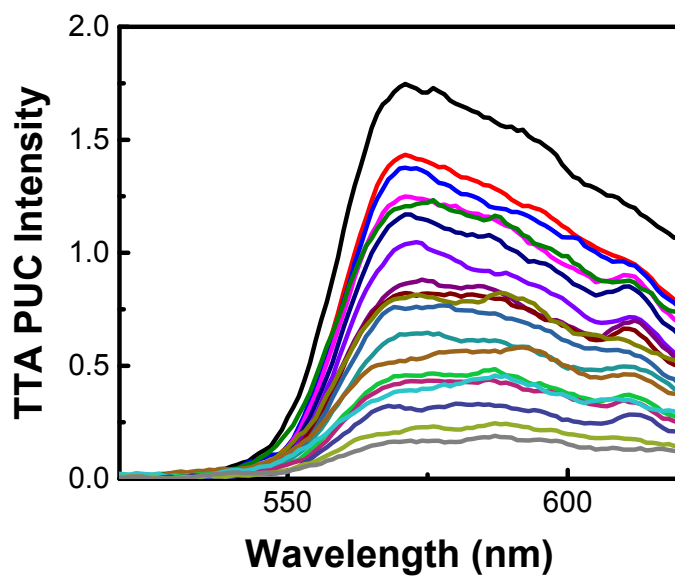

Fig.S4 TTA-PUC emission spectra of FePc-o-Co:Rub system. The concentration of Rub and FePc-o-Cou are  $5.86 \times 10^{-4}$  M and  $1.61 \times 10^{-5}$  M, respectively ( $\lambda_{ex}=632.8$  nm).

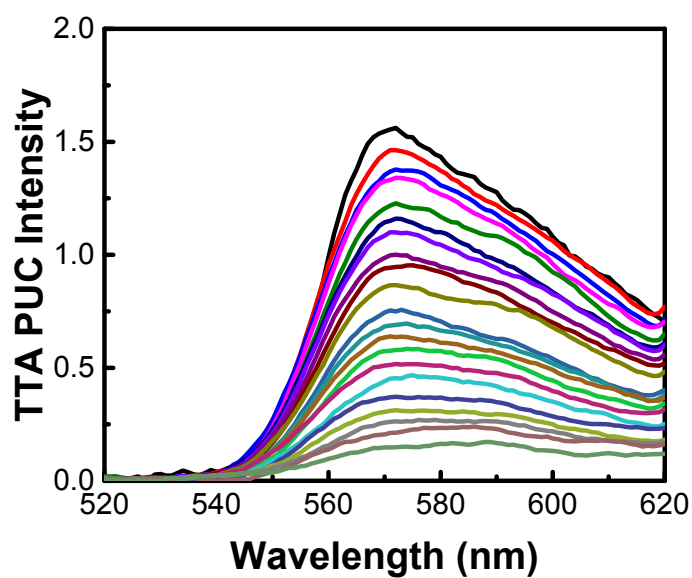

Fig.S5 TTA-PUC emission spectra of CoPc-o-Co:Rub system. The concentration of Rub and CoPc-o-Cou are  $5.86 \times 10^{-4}$  M and  $1.61 \times 10^{-5}$  M, respectively ( $\lambda_{\text{ex}}=632.8$  nm).

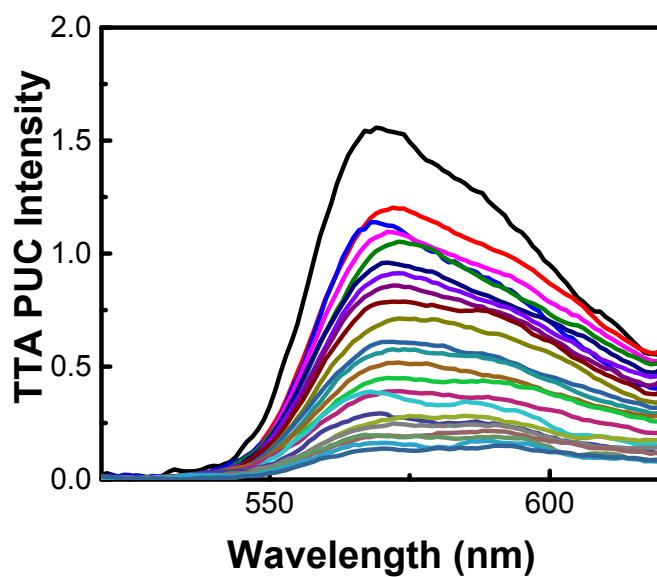

Fig.S6 TTA-PUC emission spectra of NiPc-o-Co:Rub system. The concentration of Rub and NiPc-o-Cou are  $5.86 \times 10^{-4}$  M and  $1.61 \times 10^{-5}$  M, respectively ( $\lambda_{\text{ex}}=632.8$  nm).

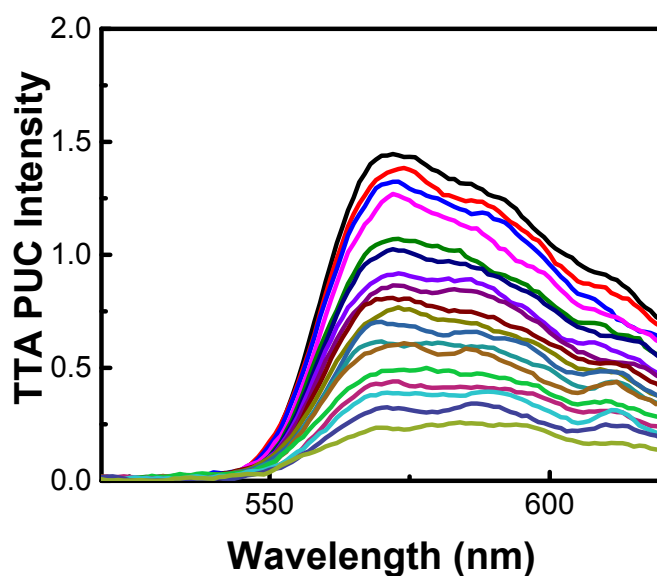

Fig.S7 TTA-PUC emission spectra of CuPc-o-Co:Rub system. The concentration of Rub and CuPc-o-Cou are  $5.86 \times 10^{-4}$  M and  $1.61 \times 10^{-5}$  M, respectively ( $\lambda_{\text{ex}}=632.8$  nm).

- 1 R. Sens and K. H. Drexhage, Fluorescence quantum yield of oxazine and carbazine laser dyes, *J. Lumin.*, 1981, **24**, 709-712.
- 2 W. Wu, D. Huang, X. Yi and J. Zhao, Tridentate cyclometalated platinum(II) complexes with strong absorption of visible light and long-lived triplet excited states as photosensitizers for triplet-triplet annihilation upconversion, *Dyes Pigm*, 2013, **96**, 220-231.
- 3 A. V. Nikolaitchik, O. Korth and M. A. J. Rodgers, Crown Ether Substituted Monomeric and Cofacial Dimeric Metallophthalocyanines. 1. Photophysical Studies of the Free Base, Zinc(II), and Copper(II) Variants, *J. Phys. Chem. A*, 1999, **103**, 7587-7596.
- 4 A. V. Nikolaitchik and M. A. J. Rodgers, Crown Ether Substituted Monomeric and Cofacial Dimeric Metallophthalocyanines. 2. Photophysical Studies of the Cobalt(II) and Nickel(II) Variants, *J. Phys. Chem. A*, 1999, **103**, 7597-7605.
